# Supplementary material
Source: PubMed Central journal article supplement (PMC4644103)
Supplement: NIHMS724268-supplement-1.pdf [file NIHMS724268-supplement-1.pdf]

Figure 3a

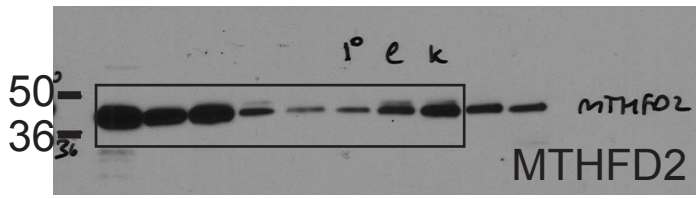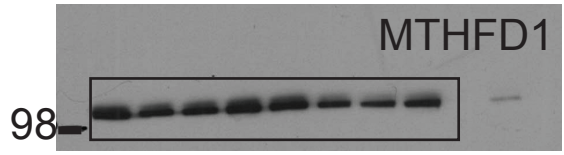

MTHFR (short exposure)

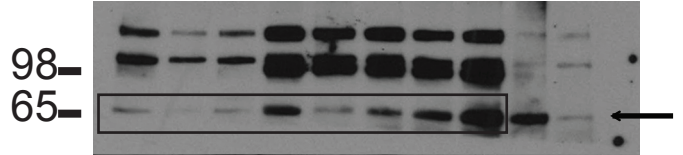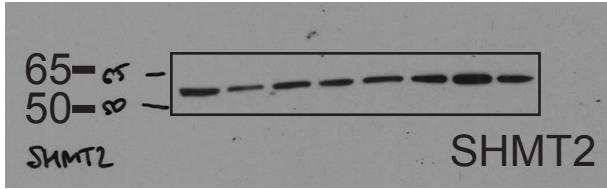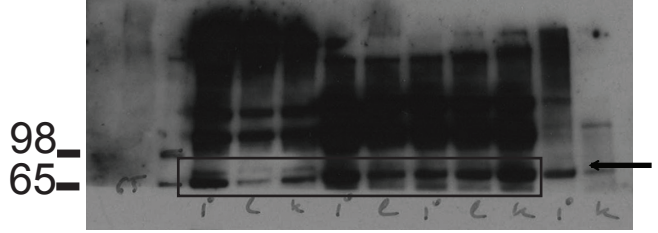

MTHFR (long exposure)

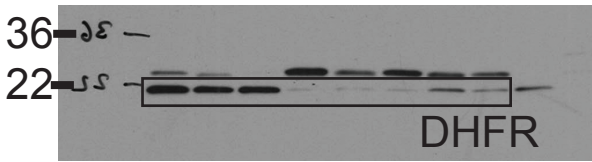

Extended Data Figure 6f

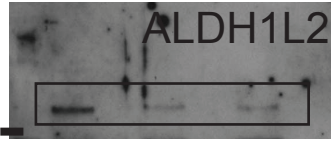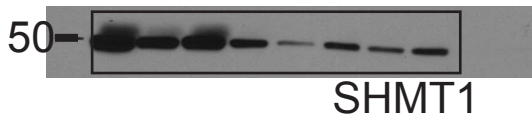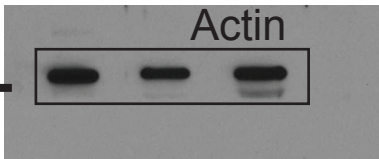

Extended Data Figure 6g

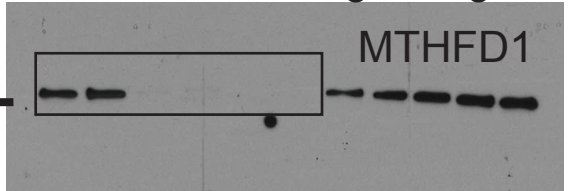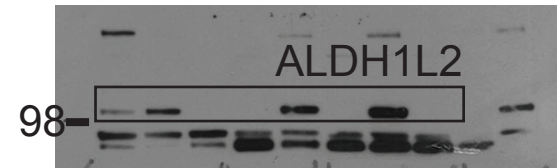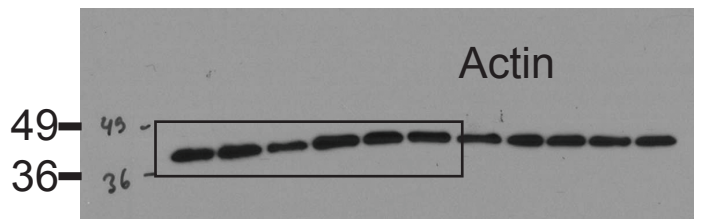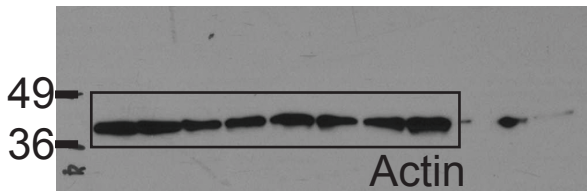

Figure 3h

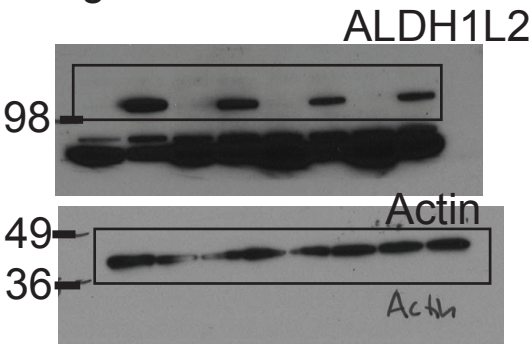

## Tumour Measurements

Figure 2a

### M405 Experiment 1

| Days | Control |     |     |     |     | NAC |     |     |     |     |
|------|---------|-----|-----|-----|-----|-----|-----|-----|-----|-----|
| 0    | 0.8     | 0.6 | 0.5 | 0.1 | 0.6 | 0.6 | 0.2 | 0.7 | 0.9 | 0.9 |
| 10   | 0.8     | 0.9 | 0.8 | 0.2 | 0.7 | 0.8 | 0.3 | 1   | 1.1 | 0.9 |
| 16   | 1       | 1.1 | 1   | 0.3 | 0.9 | 0.8 | 0.5 | 1.1 | 1.2 | 1   |
| 23   | 1.1     | 1.3 | 1.2 | 0.3 | 1.1 | 0.9 | 0.7 | 1.1 | 1.5 | 1.3 |
| 30   | 1.5     | 1.5 | 1.3 | 0.4 | 1.6 | 0.9 | 0.7 | 1.5 | 1.6 | 1.4 |
| 37   | 1.6     | 1.5 | 1.4 | 0.4 | 1.6 | 0.9 | 1   | 1.7 | 1.7 | 1.5 |
| 44   | 1.9     | 1.7 | 1.6 | 0.5 | 1.6 | 1.4 | 1.2 | 2.1 |     | 1.8 |
| 51   | 2.1     | 1.8 | 1.9 | 0.6 | 2   | 1.6 | 1.3 | 2.1 |     | 1.8 |

### M405 Experiment 2

| Days | Control |     |     | NAC |     |     |     |
|------|---------|-----|-----|-----|-----|-----|-----|
| 0    | 0.6     | 1.1 | 0.6 | 0.8 | 0.9 | 1   | 0.7 |
| 4    | 0.6     | 1.3 | 0.8 | 0.8 | 0.9 | 1.1 | 0.7 |
| 7    | 0.6     | 1.4 | 0.9 | 0.8 | 1   | 1.2 | 0.8 |
| 11   | 0.6     | 1.4 | 0.9 | 0.9 | 1   | 1.4 | 0.8 |
| 14   | 0.9     | 1.5 | 1.1 | 1.1 | 1   | 1.6 | 0.8 |
| 18   | 1.1     | 1.6 | 1.1 | 1.1 | 1   | 1.6 | 0.8 |
| 21   | 1.1     | 1.7 | 1.1 | 1.1 | 1.1 | 1.6 | 0.8 |
| 24   | 1.1     | 1.7 | 1.3 | 1.3 | 1.2 | 1.7 | 0.9 |
| 28   | 1.3     | 1.9 | 1.5 | 1.4 | 1.6 | 1.9 | 0.9 |
| 32   | 1.5     | 2   | 1.5 | 1.5 | 1.6 | 2   | 0.9 |
| 35   | 1.7     | 2.1 | 1.5 | 1.7 | 1.6 | 2   | 1   |
| 37   | 1.7     | 2.1 | 1.6 | 1.7 | 1.6 | 2.2 | 1.1 |

### M405 Experiment 3

| Days | Control |     |     |     | NAC |     |     |     |     |
|------|---------|-----|-----|-----|-----|-----|-----|-----|-----|
| 0    | 1.1     | 0.6 | 0.7 | 0.9 | 0.4 | 0.9 | 0.9 | 0.7 | 0.6 |
| 3    | 1.4     | 0.6 | 1   | 1.3 | 0.9 | 0.7 | 0.9 | 0.9 | 0.8 |
| 10   | 1.1     | 0.8 | 1.3 | 1.5 | 1.1 | 0.7 | 0.9 | 1   | 1   |
| 15   | 2.2     | 1   | 1.3 | 1.7 | 1.1 | 0.8 | 1.3 | 1.1 | 1.2 |
| 25   | 2.2     | 1.1 | 1.5 | 1.7 | 1.3 | 0.8 | 1.4 | 1.2 | 1.4 |
| 31   | 2.4     | 1.3 | 1.5 | 1.8 | 1.4 | 1   | 2   | 1.4 | 1.6 |

### M481 Experiment 1

| Days | Control |     |     | NAC |     |     |     |
|------|---------|-----|-----|-----|-----|-----|-----|
| 0    | 0.5     | 0.4 | 0.4 | 0.4 | 0.4 | 0.5 | 0.4 |
| 7    | 0.8     | 0.7 | 0.9 | 1   | 1   | 0.7 | 0.9 |
| 11   | 1.3     | 1   | 1.1 | 1.2 | 1.5 | 0.9 | 1.2 |
| 14   | 1.4     | 1.1 | 1.3 | 1.4 | 1.5 | 1   | 1.5 |
| 17   | 1.4     | 1.2 | 1.3 | 1.8 | 1.7 | 1.3 | 1.7 |
| 21   | 1.7     | 1.6 | 1.9 | 2.2 | 1.9 | 1.8 | 2   |
| 25   | 1.8     | 1.6 | 2.1 | 2.2 | 2   | 1.9 | 2.2 |

### M481 Experiment 2

| Days | Control |     |     |     |     | NAC |     |     |     |     |
|------|---------|-----|-----|-----|-----|-----|-----|-----|-----|-----|
| 0    | 0.9     | 1   | 0.9 | 1.1 | 0.8 | 1.2 | 0.9 | 0.8 | 1.3 | 0.8 |
| 7    | 1.1     | 1.5 | 1.3 | 1.6 | 1.5 | 1.3 | 1   | 1   | 1.4 | 1   |
| 15   | 1.4     | 2   | 1.4 | 1.8 | 1.7 | 1.4 | 1.2 | 1.1 | 1.6 | 1.1 |
| 21   | 1.8     | 2.2 | 1.8 | 2   | 2   | 1.5 | 1.4 | 1.4 | 1.9 | 1.2 |
| 28   | 2.1     | 2.3 | 2   | 2.3 | 2.2 | 1.6 | 1.4 | 1.6 | 2   | 1.4 |

### M481 Experiment 3

| Days | Control |     |     |     | NAC |     |     |     |     |
|------|---------|-----|-----|-----|-----|-----|-----|-----|-----|
| 0    | 0.6     | 0.7 | 0.8 | 0.8 | 0.5 | 0.7 | 0.8 | 0.7 | 0.9 |
| 7    | 1       | 0.9 | 1.1 | 1   | 0.7 | 1   | 1   | 1.1 | 0.8 |
| 14   | 1.5     | 1.4 | 1.4 | 1.1 | 0.9 | 1.1 | 1.1 | 1.2 | 1.2 |
| 21   | 1.5     | 1.7 | 1.5 | 1.4 | 1.3 | 1.4 | 1.5 | 1.3 | 1.4 |
| 25   | 2.1     | 1.9 | 1.6 | 1.8 | 1.5 | 1.7 | 1.5 | 1.7 | 1.4 |
| 36   | 2.4     | 2.3 | 2   | 2   | 1.8 | 2   | 1.6 | 1.9 | 1.7 |

### UT10 Experiment 1

| Days | Control |     |     |     |     | NAC |     |     |     |
|------|---------|-----|-----|-----|-----|-----|-----|-----|-----|
| 0    | 0.7     | 1   | 0.6 | 0.6 | 0.6 | 0.6 | 1.1 | 0.6 | 0.7 |
| 4    | 0.9     | 1   | 0.7 | 0.7 | 0.9 | 0.7 | 1.5 | 0.6 | 1.1 |
| 7    | 1       | 1.1 | 0.9 | 1   | 1   | 0.8 | 1.6 | 1.1 | 1.5 |
| 11   | 1.1     | 1.2 | 1   | 1.3 | 1.3 | 1.1 | 1.7 | 1.1 | 1.7 |
| 18   | 1.6     | 1.5 | 1.3 | 1.8 | 1.5 | 1.4 | 2.1 | 1.4 | 2   |
| 25   | 1.8     | 1.7 | 1.7 | 1.9 | 1.7 | 1.7 | 2.3 | 1.7 | 2.4 |

### UT10 Experiment 2

| Days | Control |     |     |     |     | NAC |     |     |     |     |
|------|---------|-----|-----|-----|-----|-----|-----|-----|-----|-----|
| 0    | 1       | 1   | 0.5 | 1.5 | 1.1 | 0.9 | 0.9 | 0.7 | 0.6 | 0.7 |
| 10   | 1.4     | 1.6 | 1.1 | 1.8 | 1.5 | 1.3 | 1.6 | 1.4 | 1.3 | 1.4 |
| 17   | 2       | 2.1 | 1.6 | 2.1 | 2.3 | 1.4 | 2   | 1.6 | 1.4 | 1.5 |
| 24   | 2.1     | 2.2 | 2   | 2.5 | 2.5 | 1.6 | 2.2 | 1.7 | 1.8 | 1.8 |

## Tumour Measurements

Figure 3b

### UT10 Experiment 1

| Days | Control |     |     |     |     | MTX (1.25mg) |     |     |     |     |
|------|---------|-----|-----|-----|-----|--------------|-----|-----|-----|-----|
|      |         |     |     |     |     |              |     |     |     |     |
| 0    | 1       | 1   | 0.5 | 1.5 | 1.1 | 0.7          | 1   | 0.9 | 0.7 | 0.6 |
| 10   | 1.4     | 1.6 | 1.1 | 1.8 | 1.5 | 0.9          | 1.4 | 1   | 1.3 | 1   |
| 17   | 2       | 2.1 | 1.6 | 2.1 | 2.3 | 1.3          | 1.8 | 1.2 | 1.6 | 1.3 |
| 24   | 2.1     | 2.2 | 2   | 2.5 | 2.5 | 1.5          | 2.1 | 1.5 | 1.9 | 1.7 |

### UT10 Experiment 2

| Days | Control |     |     |     |     | MTX (1.25mg) |     |     |     |     |
|------|---------|-----|-----|-----|-----|--------------|-----|-----|-----|-----|
|      |         |     |     |     |     |              |     |     |     |     |
| 0    | 0.4     | 0.3 | 0.5 | 0.5 | 0.7 | 0.5          | 0.4 | 0.6 | 0.4 | 0.4 |
| 12   | 0.9     | 1.2 | 0.9 | 1.1 | 0.9 | 1.3          | 0.8 | 1.4 | 0.8 | 0.8 |
| 15   | 1.1     | 1.6 | 1.3 | 1.1 | 1.4 | 1.7          | 1.2 | 1.7 | 0.8 | 0.8 |
| 22   | 1.3     | 2.1 | 1.5 | 1.4 | 1.7 | 1.7          | 1.5 | 1.9 | 1.1 | 1.1 |
| 29   | 1.6     | 2.4 | 1.8 | 1.5 | 2   | 1.7          | 1.8 | 2.2 | 1.3 | 1.3 |

### M481 Experiment 1

| Days | Control |     |     |     |     | MTX (1.25mg) |     |     |     |     |
|------|---------|-----|-----|-----|-----|--------------|-----|-----|-----|-----|
|      |         |     |     |     |     |              |     |     |     |     |
| 0    | 0.9     | 1   | 0.9 | 1.1 | 0.8 | 0.8          | 0.8 | 1   | 1   | 0.7 |
| 7    | 1.1     | 1.5 | 1.3 | 1.6 | 1.5 | 1            | 1.1 | 1.4 | 1.3 | 0.9 |
| 15   | 1.4     | 2   | 1.4 | 1.8 | 1.7 | 1.2          | 1.4 | 1.5 | 1.5 | 1   |
| 21   | 1.8     | 2.2 | 1.8 | 2   | 2   | 1.4          | 1.7 | 2   | 1.7 | 1.2 |
| 28   | 2.1     | 2.3 | 2   | 2.3 | 2.2 | 1.5          | 2   | 2.2 | 1.9 | 1.4 |

### M481 Experiment 2

| Days | Control |     |     |     |     | MTX (1.25mg) |     |     |     |     |
|------|---------|-----|-----|-----|-----|--------------|-----|-----|-----|-----|
|      |         |     |     |     |     |              |     |     |     |     |
| 0    | 0.9     | 1.3 | 1   | 1.1 | 1   | 0.8          | 0.8 | 0.9 | 0.7 | 1   |
| 5    | 1       | 1.6 | 1.1 | 1.1 | 1.3 | 1            | 1.3 | 1.1 | 1   | 1   |
| 11   | 1.3     | 1.7 | 1.2 | 1.1 | 1.4 | 1            | 1.5 | 1.1 | 1.1 | 1.1 |
| 21   | 1.7     | 1.9 | 1.2 | 1.3 | 1.8 | 1.2          | 1.8 | 1.2 | 1.4 | 1.4 |
| 26   | 1.7     | 2.3 | 1.3 | 1.6 | 2.1 | 1.3          | 1.8 | 1.4 | 1.7 | 1.6 |
| 32   | 1.9     | 2.4 | 1.7 | 1.8 | 2.3 | 1.3          | 1.8 | 1.4 | 1.7 | 1.7 |

### M405 Experiment 1

| Days | Control |     |     |     |     | MTX (1.25mg) |     |     |     |     |
|------|---------|-----|-----|-----|-----|--------------|-----|-----|-----|-----|
|      |         |     |     |     |     |              |     |     |     |     |
| 0    | 0.7     | 0.8 | 1.5 | 1.4 | 0.7 | 1.1          | 1.1 | 1.2 | 1.3 | 0.9 |
| 6    | 0.8     | 0.8 | 1.6 | 1.5 | 1   | 1.2          | 1.2 | 1.3 | 1.4 | 1.1 |
| 13   | 0.9     | 1.1 | 2   | 1.7 | 1.2 | 1.6          | 1.4 | 1.5 | 1.7 | 1.4 |
| 20   | 1.1     | 1.3 | 2.2 | 1.9 | 1.3 | 1.7          | 1.6 | 1.8 | 1.7 | 1.7 |

### M405 Experiment 2

| Days | Control |     |     |     |  | MTX (1.25mg) |     |     |     |  |
|------|---------|-----|-----|-----|--|--------------|-----|-----|-----|--|
|      |         |     |     |     |  |              |     |     |     |  |
| 0    | 1.2     | 1.3 | 1.9 | 1.5 |  | 1.1          | 1.5 | 1.5 | 0.8 |  |
| 5    | 1.2     | 1.4 | 1.9 | 1.6 |  | 1.1          | 1.6 | 1.5 | 0.8 |  |
| 11   | 1.4     | 1.5 | 1.9 | 1.7 |  | 1.1          | 1.7 | 1.6 | 0.9 |  |
| 21   | 1.4     | 1.7 | 1.9 | 1.8 |  | 1.1          | 1.8 | 1.7 | 1   |  |
| 26   | 1.5     | 1.9 | 1.9 | 2   |  | 1.1          | 2   | 1.8 | 1   |  |
| 32   | 1.6     | 2   | 2   | 2.1 |  | 1.1          | 2.1 | 1.9 | 1   |  |

## Tumour Measurements

Figure 3e

### M405 Experiment 1

| Days | shControl |     |     |     |     | shALDH1L2 sh1 |     |     |     |     | shALDH1L2 sh2 |     |     |     |     |
|------|-----------|-----|-----|-----|-----|---------------|-----|-----|-----|-----|---------------|-----|-----|-----|-----|
| 0    | 0.7       | 1.1 | 0.7 | 1   | 0.9 | 0.8           | 0.7 | 1   | 0.9 | 0.7 | 0.8           | 0.6 | 0.5 | 0.9 | 0.9 |
| 11   | 0.9       | 1.1 | 0.9 | 1.3 | 1   | 1             | 1   | 1.2 | 1.1 | 0.9 | 0.9           | 1   | 0.7 | 1.1 | 1   |
| 25   | 1.2       | 1.5 | 1.1 | 1.8 | 1.2 | 1.1           | 1.5 | 1.5 | 1.4 | 1.2 | 1.5           | 1.2 | 1   | 1.3 | 1.2 |
| 40   | 1.5       | 1.8 | 1.6 | 2.3 | 1.7 | 1.4           | 2   | 1.7 | 1.7 | 1.5 | 1.8           | 1.3 | 1.4 | 1.6 | 1.6 |
| 44   | 1.7       | 1.8 | 1.6 | 2.4 | 1.7 | 1.4           | 2.3 | 1.8 | 1.8 | 1.5 | 2             | 1.6 | 1.5 | 1.6 | 1.6 |

### M405 Experiment 2

| Days | Control |     |     |     | ALDH1L2 sh1 |     |     |     | ALDH1L2 sh2 |     |     |     |     |     |
|------|---------|-----|-----|-----|-------------|-----|-----|-----|-------------|-----|-----|-----|-----|-----|
| 0    | 1.1     | 0.3 | 0.5 | 0.8 | 0.8         | 1.3 | 1   | 1   | 1.1         | 1.4 | 1.2 | 1.1 | 1.2 | 1.2 |
| 14   | 1.6     | 0.5 | 0.6 | 1.2 | 1           | 1.4 | 1.3 | 1.3 | 1.5         | 2   | 1.7 | 1.4 | 1.4 | 1.4 |
| 35   | 2.5     | 1.1 | 0.8 | 1.8 | 1.7         | 2.1 | 1.6 | 1.6 | 2           | 2.4 | 2.4 | 1.9 | 2.1 | 2.1 |

### M481 Experiment 1

| Days | Control |     |     |     | ALDH1L2 sh1 |     |     |     | ALDH1L2 sh2 |     |     |     |     |     |     |
|------|---------|-----|-----|-----|-------------|-----|-----|-----|-------------|-----|-----|-----|-----|-----|-----|
| 0    | 0.7     | 0.8 | 0.9 | 0.5 | 0.8         | 1.1 | 0.9 | 0.6 | 1.2         | 0.9 | 0.9 | 0.8 | 0.7 | 0.8 | 1   |
| 28   | 1.8     | 1.3 | 1.6 | 1.2 | 1.6         | 2.4 | 1.7 | 1.5 | 1.7         | 1.8 | 1.8 | 1.3 | 1.7 | 1.5 | 1.8 |
| 42   | 1.8     | 1.6 | 2   | 1.6 | 1.7         | 2.5 | 1.9 | 1.9 | 2           | 2.1 | 1.9 | 1.5 | 1.9 | 1.7 | 2.1 |

### M481 Experiment 2

| Days | Control |     |     |     |     | ALDH1L2 sh1 |     |     |     | ALDH1L2 sh2 |     |     |     |     |     |
|------|---------|-----|-----|-----|-----|-------------|-----|-----|-----|-------------|-----|-----|-----|-----|-----|
| 0    | 0.9     | 0.8 | 0.7 | 1.1 | 0.6 | 0.9         | 1.1 | 1   | 0.8 | 1           | 1.4 | 0.9 | 1.1 | 1.4 | 1.5 |
| 11   | 1.1     | 1   | 1.1 | 1.3 | 1   | 1.3         | 1.7 | 1.2 | 1   | 1.5         | 1.7 | 1.2 | 1.2 | 1.8 | 1.8 |
| 21   | 1.3     | 1.4 | 1.5 | 1.5 | 1.5 | 1.7         | 2.1 | 1.4 | 1.4 | 2           | 1.9 | 1.4 | 1.5 | 2.2 | 2   |
| 34   | 2.2     | 2   | 2.3 | 1.8 | 2   | 2.1         | 2.5 | 1.8 | 1.9 | 2.3         | 2.2 | 2   | 2.1 | 2.5 | 2.3 |

### M481 Experiment 3

| Days | Control |     |     |     |     | ALDH1L2 sh1 |     |     |     | ALDH1L2 sh2 |     |     |     |     |     |
|------|---------|-----|-----|-----|-----|-------------|-----|-----|-----|-------------|-----|-----|-----|-----|-----|
| 0    | 1.4     | 1.6 | 1.6 | 1.7 | 1.4 | 1.5         | 1.2 | 1   | 1.8 | 1.7         | 1.2 | 1.3 | 1.5 | 1.3 | 1.3 |
| 11   | 1.7     | 2.1 | 1.9 | 2   | 1.7 | 2.1         | 1.7 | 1.3 | 2.3 | 2.5         | 1.5 | 1.6 | 1.8 | 1.8 | 1.5 |
| 17   | 1.8     |     | 2   |     | 2.2 | 2.5         | 2.1 | 1.4 |     |             | 2   | 1.9 |     |     | 1.8 |

### M481 Experiment 4

| Days | Control |     |     |     | ALDH1L2 sh1 |     |     |     | ALDH1L2 sh2 |     |     |     |  |  |
|------|---------|-----|-----|-----|-------------|-----|-----|-----|-------------|-----|-----|-----|--|--|
| 0    | 1.3     | 1.1 | 0.6 | 0.8 | 0.9         | 1   | 0.9 | 1.1 | 1           | 0.9 | 1.3 | 0.9 |  |  |
| 13   | 2.2     | 1.7 | 1.2 | 1.5 | 1.3         | 1.9 | 1.7 | 2.1 | 1.7         | 1.5 | 2.1 | 1.4 |  |  |
| 18   | 2.5     | 2.2 | 1.4 | 1.5 | 1.7         | 1.9 | 1.7 | 2.4 | 2           | 2   | 2.4 | 1.6 |  |  |
| 25   |         | 2.4 | 1.7 | 1.9 | 1.9         | 2.5 | 2.3 |     | 2.2         | 2.4 |     | 1.8 |  |  |

**Tumour Measurements**

Figure 3i

**M405 Experiment 1**

| Days | Control |     |     |     | MTHFD1 shRNA 1 |     |     |     |     | MTHFD1 shRNA 2 |     |     |     |     |
|------|---------|-----|-----|-----|----------------|-----|-----|-----|-----|----------------|-----|-----|-----|-----|
| 0    | 0.4     | 1   | 0.7 | 0.5 | 0.2            | 0.7 | 0.8 | 0.6 | 0.6 | 0.7            | 0.8 | 0.4 | 0.6 | 0.6 |
| 20   | 0.6     | 1.7 | 1.2 | 0.8 | 0.3            | 1.4 | 1.4 | 1.3 | 1.3 | 1.1            | 1.3 | 0.9 | 1.1 | 1.4 |
| 41   | 1       | 2.3 | 1.9 | 1.5 | 0.6            | 2.2 | 2.1 | 1.9 | 2   | 1.8            | 1.7 | 1.4 | 1.8 | 2.1 |
| 45   | 1       | 2.6 | 1.9 | 1.7 | 0.8            | 2.5 | 2.3 | 2.2 | 2.1 | 2.1            | 1.8 | 1.7 | 1.8 | 2.3 |

**M405 Experiment 2**

| Days | Control shRNA |     |     |     |     | MTHFD1 shRNA 1 |     |     |     |     | MTHFD1 shRNA 2 |     |     |     |     |
|------|---------------|-----|-----|-----|-----|----------------|-----|-----|-----|-----|----------------|-----|-----|-----|-----|
| 0    | 0.3           | 0.4 | 0.2 | 0.7 | 0.4 | 0.3            | 0.6 | 0.2 | 0.2 | 1   | 0.3            | 0.5 | 0.2 | 0.7 | 0.7 |
| 28   | 1.3           | 1.2 | 1.2 | 0.9 | 0.8 | 1              | 1.5 | 0.9 | 0.7 | 1.1 | 0.8            | 1.2 | 1.4 | 1.5 | 1.1 |
| 42   | 1.6           | 1.5 | 1.6 | 1.3 | 1.1 | 1.2            | 1.6 | 1.3 | 1.2 | 1.6 | 1.2            | 1.6 | 1.8 | 1.8 | 1.6 |
| 54   | 2             | 1.8 | 1.8 | 1.5 | 1.2 | 1.5            | 2   | 1.6 | 1.4 | 1.8 | 1.4            | 2.1 | 2.2 | 2.2 | 1.9 |

**M481 Experiment 1**

| Days | Control |     |     |     | MTHFD1 shRNA 1 |     |     |     |     | MTHFD1 shRNA 2 |     |     |     |     |     |
|------|---------|-----|-----|-----|----------------|-----|-----|-----|-----|----------------|-----|-----|-----|-----|-----|
| 0    | 1.2     | 1.1 | 0.9 | 0.9 | 1              | 1.4 | 1   | 0.9 | 1.3 | 1.3            | 0.6 | 0.7 | 0.5 | 1   |     |
| 9    | 1.4     | 1.2 | 1.1 | 1.2 | 1.3            | 1.4 | 1.9 | 1.4 | 1.4 | 1.7            | 1.8 | 1.2 | 1   | 0.8 | 1.5 |
| 14   | 1.6     | 1.5 | 1.3 | 1.4 | 1.6            | 1.6 | 2   | 1.4 | 1.6 | 1.9            | 2   | 1.5 | 1.1 | 1   | 1.7 |
| 20   | 1.6     | 1.6 | 1.4 | 1.4 | 1.6            | 1.6 | 2.3 | 1.5 | 1.6 | 2.2            | 2.1 | 1.6 | 1.3 | 1.3 | 1.8 |

**M481 Experiment 2**

| Days | Control |     |     |     | MTHFD1 shRNA 1 |     |     |     |     | MTHFD1 shRNA 2 |     |     |     |     |
|------|---------|-----|-----|-----|----------------|-----|-----|-----|-----|----------------|-----|-----|-----|-----|
| 0    | 1.1     | 1.6 | 1.3 | 0.9 | 1.4            | 1.7 | 1.1 | 1.5 | 1.4 | 1.2            | 1.7 | 1.2 | 1.1 | 1.4 |
| 7    | 1.6     | 2   | 1.8 | 1.4 | 1.8            | 2.3 | 1.5 | 1.9 | 1.7 | 1.4            | 1.8 | 1.4 | 1.5 | 1.9 |
| 12   | 1.7     | 2.1 | 1.9 | 1.6 | 2              | 2.3 | 1.5 | 2.1 | 1.8 | 1.5            | 1.8 | 1.5 | 1.7 | 2.3 |
